# Supplementary material
Source: publisher figshare collection journal article supplement (https://asha.figshare.com/articles/dataset/_/16620229)
Supplement: Supplementary file 1 [file 1]

Archive with 3 entries (3 files):
- JSLHR-21-00157ashaie_SuppS1.pdf
- JSLHR-21-00157ashaie_SuppS2.pdf
- JSLHR-21-00157ashaie_SuppS3.pdf
