# Supplementary material
Source: publisher figshare collection journal article supplement (https://asha.figshare.com/articles/dataset/_/16620229)
Supplement: Supplementary file 1 [file 1 › JSLHR-21-00157ashaie_SuppS1.pdf]

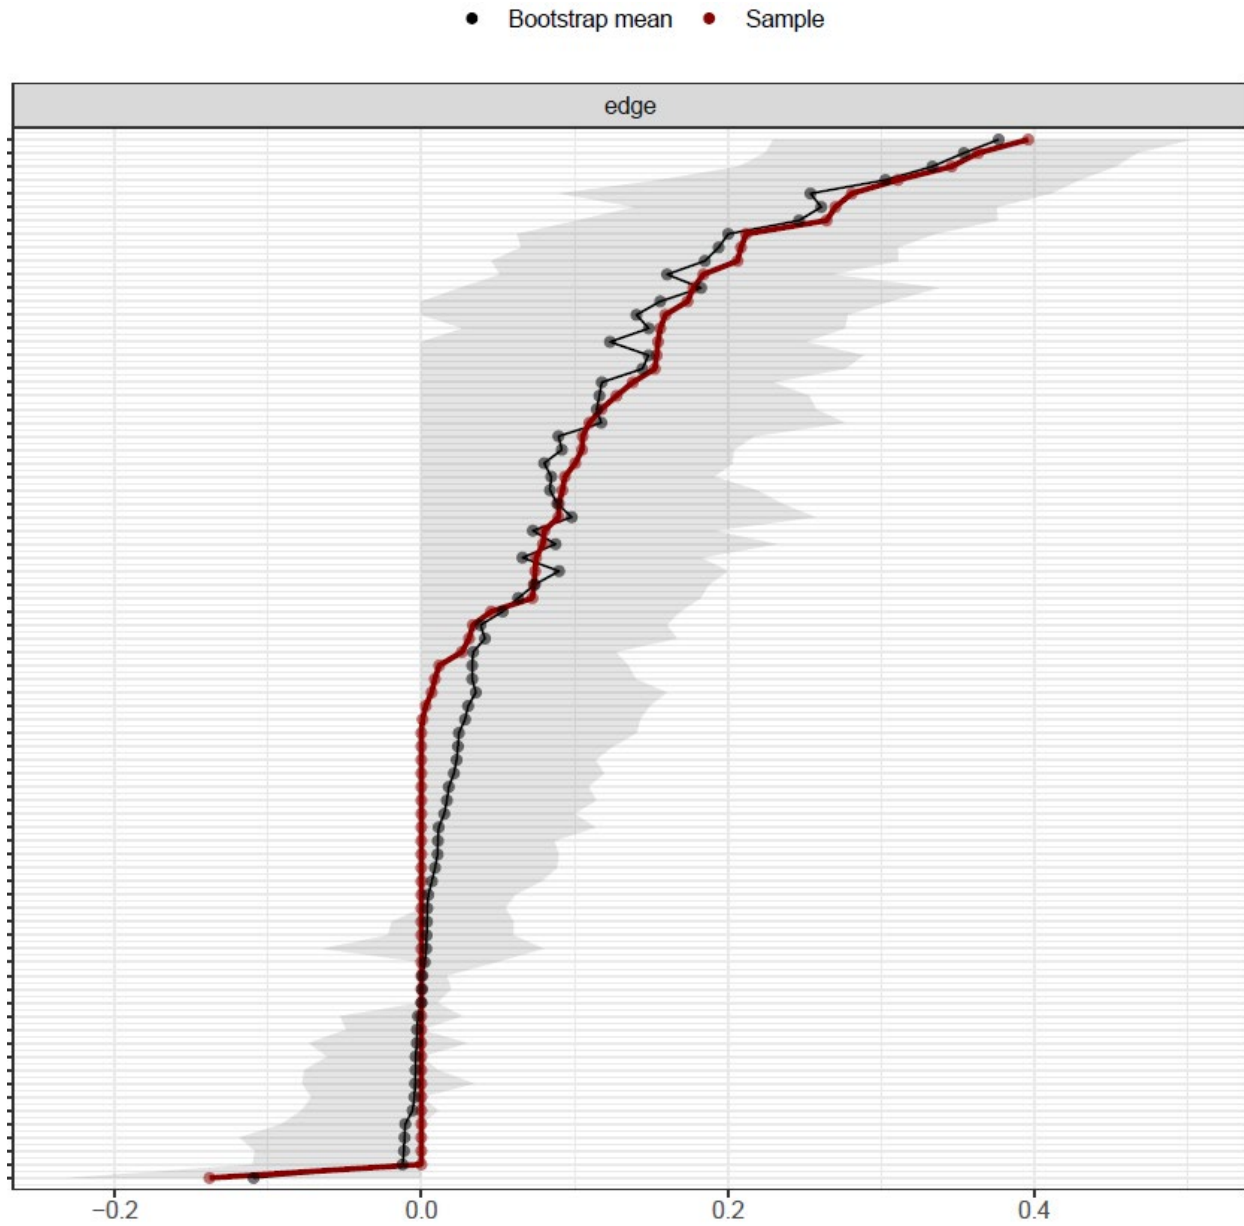

**Supplemental Material S1.** Edge weights (solid line) and 95% confidence interval (gray bars) around edge weights. Narrower confidence intervals indicate more robust estimation of edge weights.
