# Supplementary material
Source: publisher figshare collection journal article supplement (https://asha.figshare.com/articles/dataset/_/16620229)
Supplement: Supplementary file 1 [file 1 › JSLHR-21-00157ashaie_SuppS2.pdf]

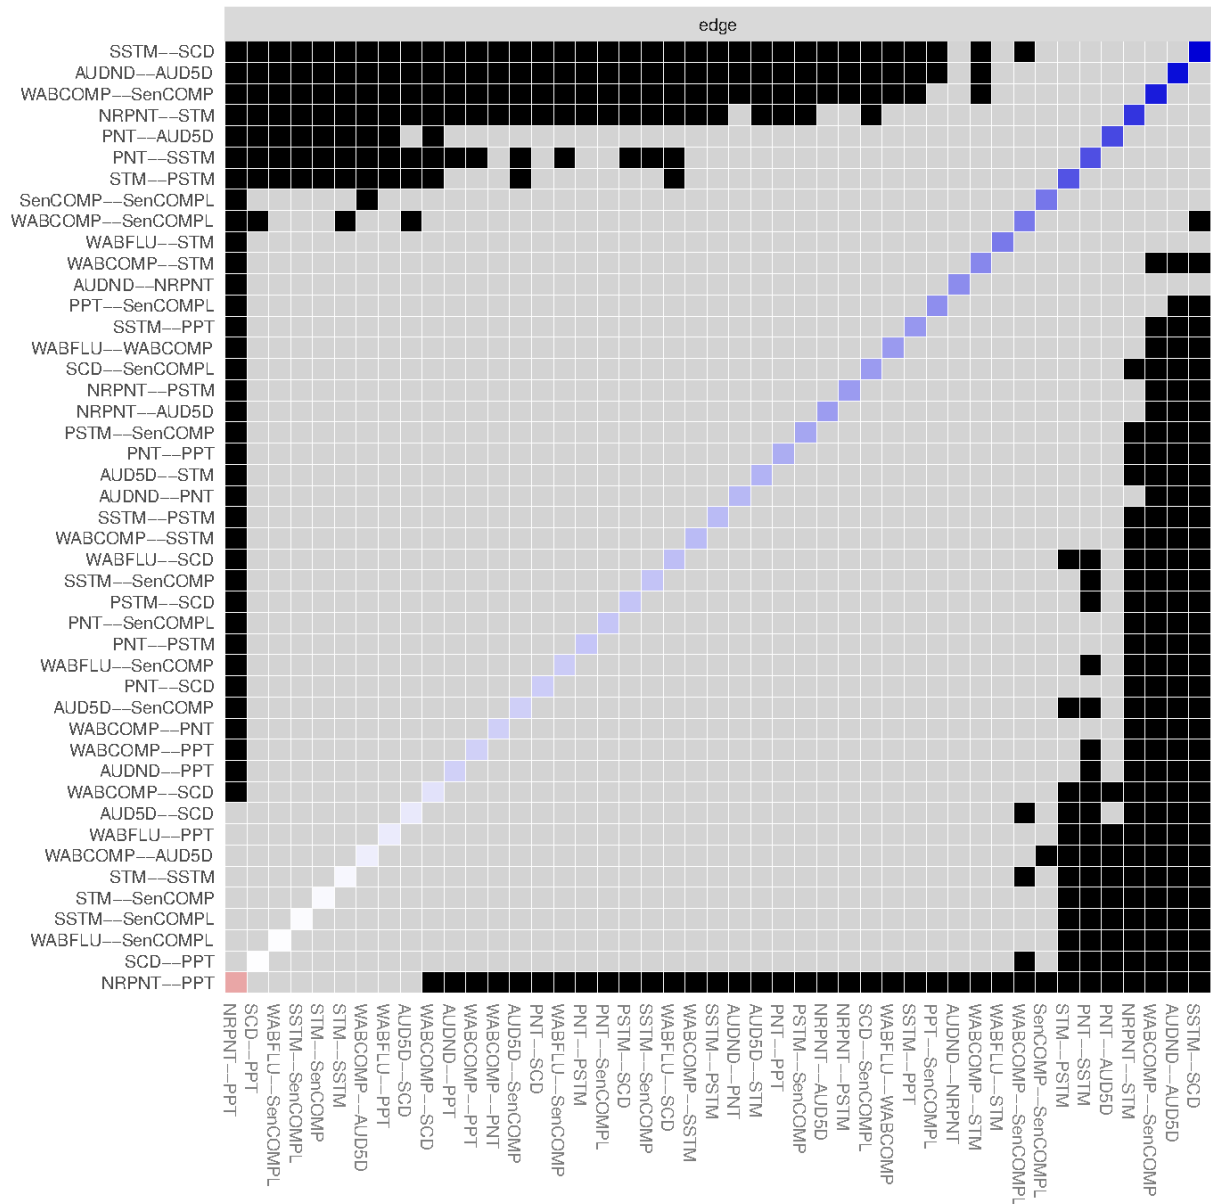

**Supplemental Material S2.** Edge weight different tests of the aphasia assessments. Significant differences among edges are shown in black. Gray boxes indicate no differences.
