# Supplementary material
Source: publisher figshare collection journal article supplement (https://asha.figshare.com/articles/dataset/_/16620229)
Supplement: Supplementary file 1 [file 1 › JSLHR-21-00157ashaie_SuppS3.pdf]

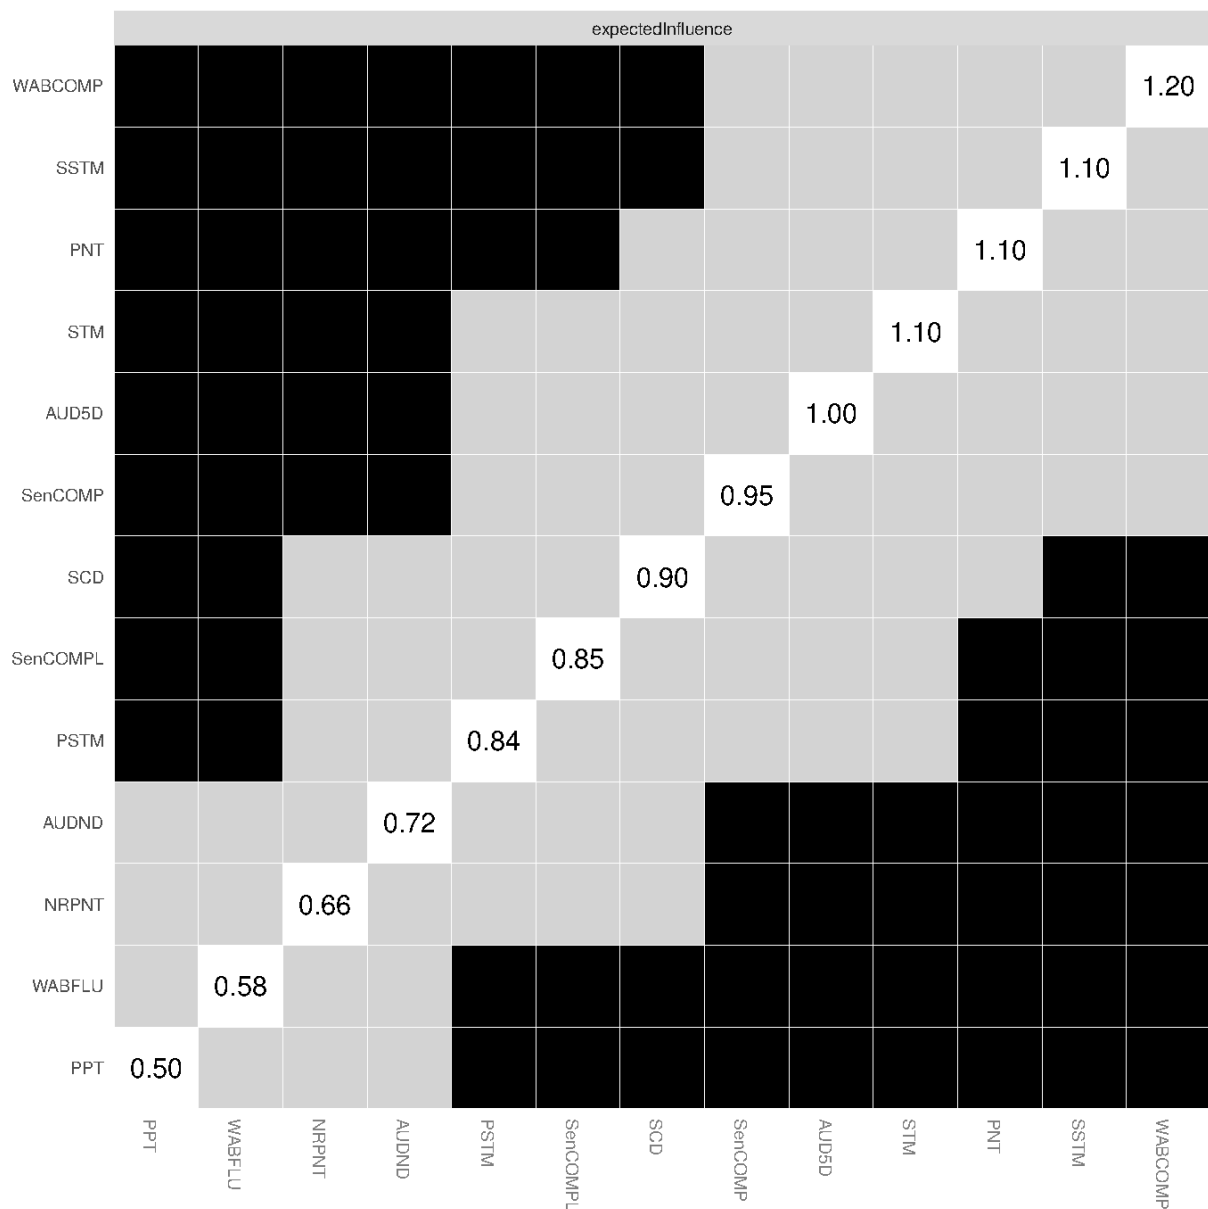

**Supplemental Material S3.** Centrality difference test of aphasia symptoms. Gray boxes indicate no difference between nodes, whereas black boxes indicate significant differences at the alpha .05 level.
